# Supplementary material
Source: publisher figshare collection journal article supplement (https://acs.figshare.com/ndownloader/files/20130911)
Supplement: Supplementary file 1 [file 20130911]

## Supporting Information

# Proton-detected Multidimensional Solid-State NMR Enables Precise Characterization of Vanadium Surface Species at Natural Abundance

*Deni Mance\*, Aleix Comas-Vives, Christophe Copéret\**

Department of Chemistry and Applied Biosciences, ETH Zürich, Vladimir-Prelog Weg 1-5, CH-8093 Zürich, Switzerland

\*Email: [mance@inorg.chem.ethz.ch](mailto:mance@inorg.chem.ethz.ch).

\*Email: [ccoperet@ethz.ch](mailto:ccoperet@ethz.ch)

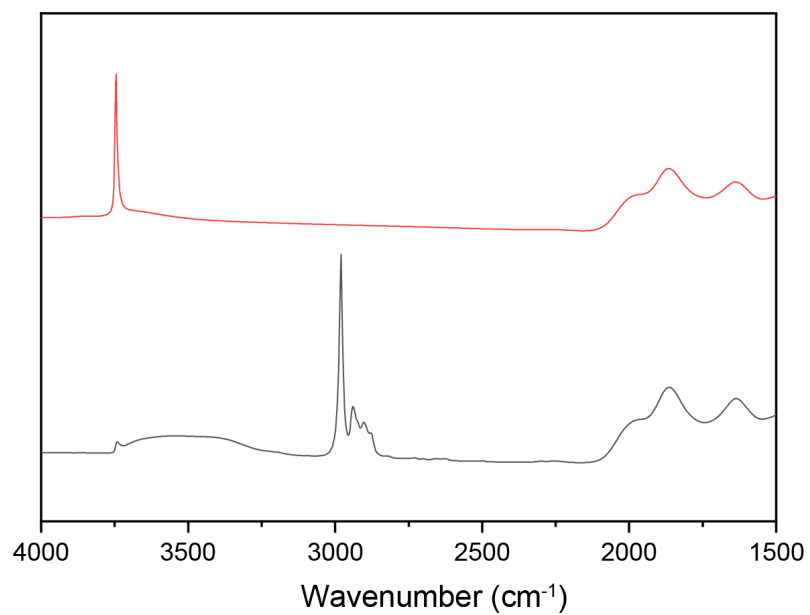

**Figure S1.** FTIR recorded in transmission mode with in red the spectrum of dehydroxylated silica at 700°C and in black the spectrum after grafting vanadium oxytriisopropoxide onto the dehydroxylated silica

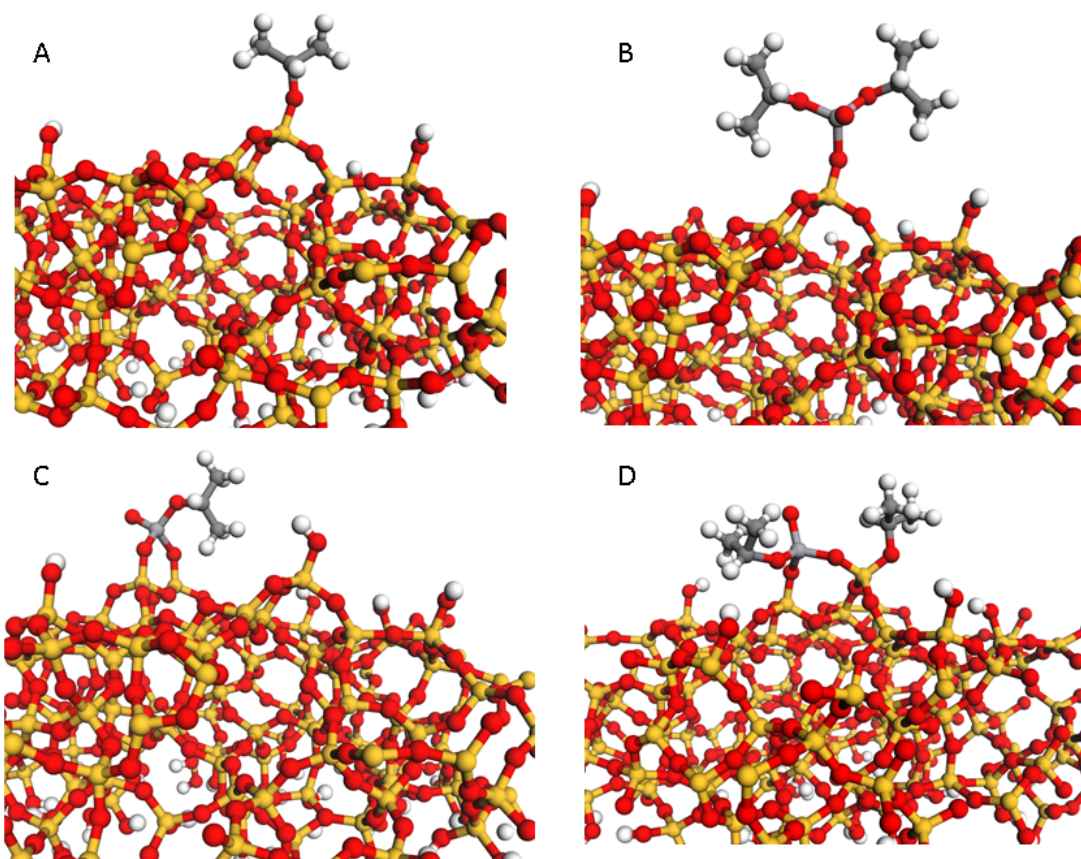

**Figure S2.** Geometry optimized surface structures using VASP. A) OiPr, B) single sites  $\text{VO}(\text{OiPr})_2$ , C) bis-grafted  $\text{VO}(\text{OiPr})$  and D) bis-grafted  $\text{VO}(\text{OiPr})$  within presence of OiPr modeled on dehydroxylated silica.
